# Supplementary material for: Genetic Contribution to Initial and Progressive Alcohol Intake Among Recombinant Inbred Strains of Mice
Source: Front Genet. 2018 Sep 25;9:370. doi: 10.3389/fgene.2018.00370 (PMC6167410; doi:10.3389/fgene.2018.00370)
Supplement: TABLE S2 — QTL comparison table. [file Table_2.XLSX]

## Sheet: STable1
	Supplemental Table 2. QTL Comparison Table
	Time	Method	Chr	Locus	Mb	Additive Effect	LOD	Significance	CI Mb (left)	CI Mb (right)
	W1.4H	HK	1	rs31307349	183.947	-0.508	2.93514	Suggestive	183.605	184.91
	W1.4H	GEMMA	1	rs31307349	183.947	--	2.88526	--	173.646	184.91
	W1.2H	HK	1	rs31307349	183.947	-0.348	2.32126	Suggestive	178.157	186.207
	W1.2H	GEMMA	1	rs31307349	183.947	--	2.35544	--	178.157	186.207
	W5.2H	HK	1	rs3681873	184.445	-0.277	2.25965	Suggestive	178.157	186.207
	W5.2H	GEMMA	1	rs3681873	184.445	--	2.5313	--	178.157	186.207
	W1.4H	HK	2	rs13476358	16.306	-0.459	2.42755	Suggestive	9.336	42.674
	W1.4H	GEMMA	2	Affy_PC2_15	15	--	3.06871	Suggestive	9	30.441
	W2.4H	HK	2	rs27126014	17.898	-0.488	2.30672	Suggestive	14.395	55.393
	W2.4H	GEMMA	2	rs27126014	17.8981	--	2.72914	--	14.3951	55.4139
	W2.2H	HK	4	rs32939068	153.934	-0.247	2.46464	Suggestive	151.094	156.101
	W2.2H	GEMMA	4	rs32939068	153.934	--	3.43855	Suggestive	153.372	155.226
	W3.2H	HK	4	rs32939068	153.934	-0.303	2.81258	Suggestive	151.094	156.101
	W3.2H	GEMMA	4	rs32939068	153.934	--	4.08306	Suggestive	153.372	155.493
	W1.4H	HK	6	rs30422489	91.707	-0.508	3.07527	Suggestive	89.011	93.6
	W1.4H	GEMMA	6	rs30422489	91.7069	-	3.22637	Suggestive	89.0106	93.5998
	W1.4H	HK	8	rs13479903	88.329	-0.501	2.64208	Suggestive	80.46	95.747
	W1.4H	GEMMA	8	rs36478481	82.9402	--	2.10981	--	77.4414	114.541
	W2.4H	HK	8	rs36478481	82.94	-0.491	2.40803	Suggestive	77.441	95.736
	W2.4H	GEMMA	8	rs36478481	82.9402	--	2.88661	--	77.4414	95.7473
	W3.4H	HK	8	rs49907965	89.094	-0.573	2.6705	Suggestive	80.46	95.747
	W3.4H	GEMMA	8	rs49907965	89.0943	--	3.16376	Suggestive	86.38	95.7473
	W1.2H	HK	8	rs49907965	89.094	-0.37	2.37636	Suggestive	80.46	95.736
	W1.2H	GEMMA	8	rs13479903	88.3289	--	2.49282	--	80.4601	95.7473
	W3.2H	HK	8	rs49907965	89.094	-0.296	2.27397	Suggestive	76.267	95.747
	W3.2H	GEMMA	8	rs13479903	88.3289	--	2.69834	--	77.4414	95.7473
	W4.2H	HK	8	rs49907965	89.094	-0.366	2.41757	Suggestive	80.46	95.736
	W4.2H	GEMMA	8	rs49907965	89.0943	--	2.82877	--	80.4601	95.7473
	W5.2H	HK	8	rs49907965	89.094	-0.325	2.77332	Suggestive	82.87	95.736
	W5.2H	GEMMA	8	rs49907965	89.0943	--	3.23324	Suggestive	82.8699	95.7473
	W1.4H	HK	12	rs3717933	11.076	-0.488	2.76226	Suggestive	9.864	15.82
	W1.4H	GEMMA	12	rs49972008	12.6025	--	3.07248	Suggestive	7.99062	26.0348
	Slope.2H	HK	15	rs31691968	63.392	0.045	3.19284	Suggestive	58	67.99
	Slope.2H	GEMMA	15	rs31691968	63.3923	--	3.69022	Suggestive	58	67.9904
