# Supplementary material for: Genetic Contribution to Initial and Progressive Alcohol Intake Among Recombinant Inbred Strains of Mice
Source: Front Genet. 2018 Sep 25;9:370. doi: 10.3389/fgene.2018.00370 (PMC6167410; doi:10.3389/fgene.2018.00370)
Supplement: TABLE S5 — Full list of high priority candidate genes and evidence for selection. [file Table_5.xlsx]

## Sheet: STable4
	Supplemental Table 5. Prioritized QTL Candidate Genes.
	Symbol	Description	GeneWiki	QTL	Chr	Mb	HIP:Probeset	eQTL:Chr	eQTL:Mb	eQTL:LOD	Sig	HIP:MeanExpr	Slope2HWeek(r)	2H.W3avg(r)	2H.W5avg(r)	W1.4H(r)	p-value(r)	N(r)
	Dnajc1	DnaJ (Hsp40) homolog, subfamily C, member 1	GRP78 partner in ER; translation, beneficial effects in ER stress induced metabolic dysfunction	Q2:Initial	2	18.2172	1420500_at	2	17.9487	2.8364	Sug	8.73644	-0.145079	0.0833419	0.00264263	0.126018	-	-
	Armc3	armadillo repeat containing 3	?	Q2:Initial	2	19.3006	1429816_at	2	22.8209	8.71333	Sig	5.63932	0.220319	-0.230654	-0.174564	-0.303799	-	-
	Arhgap21	Rho GTPase activating protein 21	Signaling	Q2:Initial	2	20.8484	1428368_at	2	24.0936	5.8404	Sig	11.7562	-0.0340344	-0.443525	-0.418423	-0.348385	0.0429	34
	Gpr158	RIKEN cDNA 5330427M13 gene	Regulator of RGS complexes and rgs7 signaling in brain; human variants may influence energy expenditue and metabolism	Q2:Initial	2	21.3671	1458107_at	X	114.16	2.04148	-	6.50986	-0.134982	0.321533	0.274577	0.390959	0.0215	34
	Gpr158	G protein-coupled receptor 158	Regulator of RGS complexes and rgs7 signaling in brain; human variants may influence energy expenditue and metabolism	Q2:Initial	2	21.8108	1438526_at	2	22.8209	23.178	Sig	6.11321	-0.0757607	0.31333	0.259021	0.254383	-	-
	Myo3a	myosin IIIA	Acin based motor protein with kinase activity	Q2:Initial	2	22.283	1431983_at	3	11.2416	1.44631	-	6.35193	0.478704	-0.0151922	0.00614919	-0.391113	0.0214	34
	Mrpl41	mitochondrial ribosomal protein L41	Regulation of cell death	Q2:Initial	2	24.9741	1428588_a_at	2	24.9485	17.5269	Sig	10.2935	-0.142236	0.37846	0.308021	0.382226	0.025	34
	Uap1l1	UDP-N-acteylglucosamine pyrophosphorylase 1-like 1	?	Q2:Initial	2	25.3616	1436890_at	2	24.9485	23.865	Sig	9.00677	-0.133211	0.351707	0.304051	0.333818	-	-
	Entpd2	ectonucleoside triphosphate diphosphohydrolase 2	Metabolism	Q2:Initial	2	25.4007	1418259_a_at	2	24.9485	24.8135	Sig	9.71996	-0.0401364	0.416816	0.359769	0.410022	0.0153	34
	Ptgds	prostaglandin D2 synthase	Glucose and insulin metabolism; regulated by estradiol; inflammatory response	Q2:Initial	2	25.4673	1423859_a_at	2	24.9485	4.04861	Sig	13.9015	0.222216	0.13465	0.162625	0.0501221	-	-
	C8g	complement component 8, gamma subunit	Immune function	Q2:Initial	2	25.4991	1451625_a_at	2	24.9485	4.13076	Sig	7.12532	-0.103255	0.246189	0.156868	0.317299	-	-
	Kcnt1	potassium channel, subfamily T, member 1 (slack, low threshold slowly adapting)	Localized ot the postsynaptic density; involved in learning and memory and initial response to novel situations and environments	Q2:Initial	2	25.916	1439486_at	2	25.8527	4.56492	Sig	8.97599	-0.0859457	0.0173659	0.0581075	0.190824	-	-
	Lhx3	LIM homeobox protein 3	Trancription factor activity, nervous system development	Q2:Initial	2	26.2014	1421753_a_at	3	57.6734	2.32981	-	6.23161	0.0445692	0.458549	0.378363	0.467333	0.00479	34
	Egfl7	EGF-like domain 7	Development	Q2:Initial	2	26.5923	1421335_a_at	2	25.8712	3.54726	Sug	7.80717	-0.0875587	0.245685	0.2738	0.332014	-	-
	Rapgef1	Rap guanine nucleotide exchange factor (GEF) 1	Signaling; GABAergic neuronal development	Q2:Initial	2	29.6979	1441386_at	2	25.6496	2.60029	Sug	7.41339	-0.225027	0.265457	0.275656	0.44158	0.00829	34
	Nup188	nucleoporin 188	Development	Q2:Initial	2	30.3436	1427047_at	X	126.953	2.07779	-	8.49773	-0.287922	0.178502	0.1573	0.463931	0.00516	34
	Plxna1	plexin A1	Development; signaling	Q6:Initial	6	89.3164	1428623_at	6	89.0106	5.71519	Sig	9.76579	-0.0126177	0.155657	0.132888	0.261022	-	-
	Fgd5	FYVE, RhoGEF and PH domain containing 5	Endothelial specific gene	Q6:Initial	6	92.0754	1460578_at	18	41.781	2.22651	-	8.00162	0.156675	-0.306833	-0.254592	-0.445648	0.00762	34
	Adamts9	a disintegrin-like and metalloprotease (reprolysin type) with thrombospondin type 1 motif, 9	Endothelial and vascular response	Q6:Initial	6	92.9261	1431399_at	4	155.226	2.36247	Sug	9.38025	0.309137	-0.216251	-0.191646	-0.506446	0.00189	34
	Nt5c1b	5'-nucleotidase, cytosolic IB	Metabolism	Q12:Initial	12	10.393	1457019_s_at	3	10.0943	2.76748	Sug	7.18032	0.314619	-0.155301	-0.0963616	-0.426017	0.0113	34
	Per3	period 3	Circadian signaling	Q4:Sustained	4	151.005	1460662_at	4	149.906	30.4897	Sig	7.11146	-0.302539	-0.349495	-0.297118	-0.161147	0.0422	34
	Prdm16	PR domain containing 16	Metabolism; brown versus white fat differentiation	Q4:Sustained	4	154.32	1429308_at	4	154.054	19.926	Sig	6.5207	0.242265	0.512535	0.418816	0.28744	0.00162	34
	Tnfrsf14	tumor necrosis factor receptor superfamily, member 14 (herpesvirus entry mediator)	Inflammation and immune response	Q4:Sustained	4	154.919	1442338_at	4	155.742	5.69887	Sig	5.20377	-0.0287169	0.212388	0.189239	0.242103	-	-
	Cyld	cylindromatosis (turban tumor syndrome)	Immune; regulator of NF-kappaB signaling	Q8:Sustained	8	88.748	1429618_at	8	88.3839	4.04863	Sig	10.406	-0.308537	-0.383385	-0.367673	-0.226532	0.0317	34
	Chd9	chromodomain helicase DNA binding protein 9	Expressed in osteoprogeneitors	Q8:Sustained	8	91.054	1457672_at	8	94.3743	10.3121	Sig	9.54813	-0.152161	-0.326854	-0.307436	-0.239433	-	-
	Aktip	AKT interacting protein	Ft1 protein; telomere maintenance; development	Q8:Sustained	8	91.1235	1437767_s_at	8	90.8193	14.012	Sig	7.49361	0.0792192	0.400892	0.462922	0.437773	0.00528	34
	Fto	fat mass and obesity associated (alpha-ketoglutarate-dependent dioxygenase FTO)	Metabolism; energy homeostasis; regulator of adipogenesis	Q8:Sustained	8	91.6664	1430829_s_at	8	90.8193	11.0485	Sig	6.9368	0.0126463	0.382565	0.389848	0.414524	0.0219	34
	Crnde	colorectal neoplasia differentially expressed (non-protein coding)	Metabolism; control of glucose and lipid metabolism	Q8:Sustained	8	92.3264	1431297_a_at	8	90.6483	5.0469	Sig	6.6273	0.13652	0.39494	0.459416	0.395481	0.0057	34
	Mmp2	matrix metalloproteinase 2	Immune system; inflammatory response	Q8:Sustained	8	92.8532	1439364_a_at	8	90.614	6.51016	Sig	6.66073	-0.12656	-0.305739	-0.360719	-0.293191	0.0355	34
	Coq9	coenzyme Q9	Metabolism; deficiency impacts mitochondrial function	Q8:Sustained	8	94.8543	1428134_at	8	94.3743	6.93077	Sig	10.4853	-0.184014	-0.104091	-0.170681	-0.113115	-	-
	Kifc3	kinesin family member C3	Peroxisomal transport	Q8:Sustained	8	95.1	1416199_at	8	94.3743	12.5825	Sig	10.0084	0.375452	0.42259	0.504884	0.320671	0.00197	34
	Supplemental Table S5. Prioritized QTL Candidate Genes. High priority candidate genes selected based on regulation of expression by local sequence variants (cis eQTL) and co-expression with DID intake traits (Slope2HWeek, 2H.W3avg, 2H.W5avg, and W1.4H). Gene expression signatures for each gene generated on the Affymetrix M430 platform for BXD hippocampus (HIP, naïve to treatment). Genes in bold h…
